1 **Title:**

2 Dasabuvir inhibits human norovirus infection in human intestinal enteroids

3

4 **Authors:**

5 Tsuyoshi Hayashi <sup>1\*</sup>, Kosuke Murakami <sup>1</sup>, Junki Hirano <sup>1</sup>, Yoshiki Fujii <sup>1</sup>, Yoko Yamaoka

6 <sup>1</sup>, Hirofumi Ohashi <sup>1,2</sup>, Koichi Watashi <sup>1,2,3</sup>, Mary K. Estes <sup>4</sup>, Masamichi Muramatsu <sup>1\*</sup>

7

8 **Affiliation:**

9 1. Department of Virology II, National Institute of Infectious Diseases, Tokyo, Japan

10 2. Department of Applied Biological Sciences, Tokyo University of Science, Chiba, Japan

11 3. Research Center for Drug and Vaccine Development, National Institute of Infectious  
12 Diseases, Tokyo, Japan

13 4. Departments of Molecular Virology and Microbiology and of Medicine, Baylor College  
14 of Medicine, Houston, Texas, USA

15

16 \* Correspondence to: Tsuyoshi Hayashi ([hayashit@nih.go.jp](mailto:hayashit@nih.go.jp)), Masamichi Muramatsu

17 ([muramatsu@nih.go.jp](mailto:muramatsu@nih.go.jp))

18

19

20

21 **Keywords:** norovirus; acute gastroenteritis; intestinal enteroids; compound screen;

22 antiviral drug; dasabuvir

23

24 **Abstract**

25           Human noroviruses (HuNoVs) are acute viral gastroenteritis pathogens that  
26 affect all age groups, yet no approved vaccines and drugs to treat HuNoV infection are  
27 available. In this study, with a human intestinal enteroid (HIE) culture system where  
28 HuNoVs are able to replicate reproducibly, we screened an antiviral compound library to  
29 identify compound(s) showing anti-HuNoV activity. Dasabuvir, which has been  
30 developed as an anti-hepatitis C virus agent, was found to inhibit HuNoV infection in  
31 HIEs at micromolar concentrations. Dasabuvir also inhibited severe acute respiratory  
32 syndrome coronavirus 2 (SARS-CoV-2) and human A rotavirus (RVA) infection in HIEs.  
33 To our knowledge, this is the first study to screen an antiviral compound library for HuNoV  
34 using HIEs and we successfully identified dasabuvir as a novel anti-HuNoV inhibitor that  
35 warrants further investigation.

36

37 **Main text:**

38 Human noroviruses (HuNoVs) cause acute gastroenteritis and foodborne  
39 diseases among all age groups worldwide. HuNoVs often cause an economic burden to  
40 societies due to health care costs and loss of productivity, and therefore pose a public  
41 health concern. Noroviruses are non-enveloped viruses possessing a positive sense,  
42 single stranded RNA genome whose length is approximately 7.5kb long. They are  
43 genetically classified in 10 genogroups (GI-GX) and further divided into 48 genotypes  
44 based on their capsid and polymerase gene sequences (Chhabra et al., 2019). Among  
45 those, GI.4 genotype is the most frequently distributed and causes outbreak in humans  
46 globally (Cannon et al., 2021; Mallory et al., 2019).

47 Since a robust culture system to allow HuNoV replication was not established  
48 for almost 50 years, there is no established treatment options such as vaccines or  
49 antiviral regimens available. Recently, several HuNoV successive cultivation models  
50 employing a human B cell line (Jones et al., 2014), tissue stem cell-derived human  
51 intestinal enteroids (HIEs) (Ettayebi et al., 2016), human induced pluripotent stem cell-  
52 derived intestinal organoids (Sato et al., 2019), and zebrafish larvae (Van Dycke et al.,  
53 2019) have been developed. The stem cell-derived HIE system is currently used by  
54 researchers worldwide to study HuNoV biology and inactivation strategies (Alvarado et  
55 al., 2018; Chan et al., 2021; Costantini et al., 2018; Ettayebi et al., 2021; Hosmillo et al.,  
56 2020; Lin et al., 2020; Murakami et al., 2020), although, to our knowledge, compound  
57 screens for identifying HuNoV antiviral agents have not been reported.

58 Drug repurposing is a time-saving, affordable strategy to discover new  
59 therapeutic uses for approved or developing drugs to treat other disease(s) apart from  
60 their original use (Low et al., 2020). This strategy is being widely utilized to establish

61 effective therapeutics for treatment of coronavirus disease 2019 (COVID-19). Indeed,  
62 numerous antiviral drugs including remdesivir, ivermectin, or nelfinavir has been  
63 identified as promising candidates for SARS-CoV-2 (Low et al., 2020; Watashi, 2021).  
64 Here, with the HIE culture system, we screened an antiviral compound library composing  
65 326 bioactive substances, including those targeting influenza virus, human  
66 immunodeficiency virus (HIV), or Hepatitis C virus (HCV) to reassess their effect on  
67 HuNoV infection.

68 Three dimensional (3D) HIEs were dissociated, and plated on collagen-coated  
69 96 well plates to prepare two-dimensional (2D) monolayers (**Fig. 1A**). The cells were  
70 then differentiated by culturing them in differentiation medium, which does not include  
71 Wnt3A and R-spondin to support HIE's stemness. The differentiated HIE monolayers  
72 were inoculated with GII.4 HuNoV in the presence of each compound dissolved in DMSO  
73 for 1 hr at 37°C. DMSO was added to the wells without compound (DMSO control). For  
74 this screening step, one well was used to analyze each compound ( $n = 1$ ). The cells were  
75 washed, and cultured in differentiation medium containing the compound for 24 hrs. The  
76 infected cells and supernatant were then harvested, and viral replication was evaluated  
77 by RT-qPCR analysis to determine the HuNoV RNA genome equivalents (GEs) (**Fig.**  
78 **1B**). Cytotoxicity for each compound was also determined by LDH assay. First, to  
79 evaluate the reproducibility of our HIE system with respect to HuNoV growth throughout  
80 the screening, we plotted the level of viral GEs at 1 or 24 hr post-infection (hpi) from 7  
81 independent experiments that were used for the compound screen. The fold changes of  
82 viral GEs between 1 and 24 hpi in each experiment ranged from 65 to 230 (mean  $\pm$  s.d.;  
83  $104.3 \pm 58.3$ ). A positive control, 2'-C-Methylcytidine (2-CMC) completely blocked viral  
84 infection without any cytotoxicity in all experiments, consistent with a previous report (**Fig.**

85 **1C and D)** (Hosmillo et al., 2020). These results demonstrate that our HIE cultivation  
86 system reproducibly supports HuNoV replication, and is suitable for evaluating the effect  
87 of the compounds against HuNoV.

88 We next determined the relative percentages of HuNoV GE and cytotoxicity at  
89 24 hpi by normalizing the data of compound-treated cells to DMSO-treated cells. The  
90 screening results were plotted as (%) HuNoV GE vs (%) Cytotoxicity (**Fig. 1E**). We  
91 selected 3 compounds, Dasabuvir (DSB), G243-1637, and 3370-3410, which reduced  
92 HuNoV GEs by 95% without cytotoxicity for further validation (**Fig. 1E and Table S1**).  
93 For validation purpose, we repeated the experiment with technical 3 replicates and  
94 confirmed the reproducible inhibitory effect of DSB and G243-1637 against HuNoV  
95 infection (**Fig. S1**). We selected DSB which showed strongest inhibitory effect for further  
96 studies. DSB has been developed as one of direct-acting anti-HCV drugs which targets  
97 HCV NS5B RNA-dependent RNA polymerase (RdRp) (Trivella et al., 2015). So far, there  
98 have been no report regarding any antiviral effects on HuNoV.

99 Next, we performed additional experiments, with DSB at varying concentrations  
100 ranging from 3.125  $\mu\text{M}$  to 50  $\mu\text{M}$  to calculate  $\text{EC}_{50}$  and  $\text{CC}_{50}$  values. DSB treatment alone  
101 showed no cytotoxicity, except for the highest concentration (50  $\mu\text{M}$ ), which showed a  
102 17% reduction of cellular ATPs (cell viability) or 10% increase of LDH release  
103 (cytotoxicity), as compared to the DMSO control (**Fig. S2**). Again, DSB did not induce  
104 cytotoxicity, except at the highest dose (50  $\mu\text{M}$ ) in J2 monolayers infected with GII.4  
105 HuNoV, whereas it showed a dose-dependent inhibition of viral replication with an  $\text{EC}_{50}$   
106 value of 11.71  $\mu\text{M}$  (**Fig. 2A**). To ascertain the authenticity of DSB's inhibitory effect, we  
107 repeated the experiment with the identical compound from different resources and found  
108 that the results were comparable (**Fig. S3**). Dose-dependent reduction of viral replication

109 by DSB was also observed in J2 HIE monolayers infected with a different HuNoV strain  
110 GII.3 (**Fig. 2B**). We further assessed DSB's inhibitory effect using J3 HIEs established  
111 from an independent donor following the infection of GII.3 or GII.4 HuNoV and observed  
112 the same trends (**Fig. 2C and D**). Taken together, DSB exerted an inhibitory effect on  
113 two HuNoV genotypes and HIEs established from distinct individuals, strongly  
114 suggesting that the effect is neither genotype- nor HIE (donor)-dependent.

115         Next, we tested the effect of DSB on the infection of human A rotavirus (RVA)  
116 and SARS-CoV-2, both of which has been previously reported to be able to infect and  
117 replicate HIEs (Lamers et al., 2020; Saxena et al., 2016; Zou et al., 2019). Two  
118 concentrations of DSB were used in these studies; non-effective (6.25  $\mu$ M) and effective  
119 concentration (20  $\mu$ M) against HuNoV, respectively. As shown in **Fig. 3A and B**, DSB  
120 showed an antiviral effect (2.75-fold decrease) on RVA infection at a concentration of 20  
121  $\mu$ M, while it almost completely inhibited (26.9-fold decrease) SARS-CoV-2 infection in J2  
122 HIE monolayers. We also confirmed DSB's inhibition with no cytotoxicity using  
123 VeroE6/TMPRSS2 cells which are highly susceptible to SARS-CoV-2 infection (**Figs. 3C,**  
124 **D, and S4**) (Matsuyama et al., 2020).

125         The mechanism of action for the virus inhibitions by DSB remains to be  
126 elucidated. DSB is a non-nucleotide inhibitor of HCV NS5B RdRp that likely binds to  
127 palm domain of NS5B and thereby prevents elongation of the nascent viral genome (Kati  
128 et al., 2015). Therefore, it might also target the RdRp of other viruses such as HuNoV  
129 and SARS-CoV-2, possibly because of the presence of conserved sequences being  
130 targeted by DSB. Indeed, there is a report showing that DSB partially inhibits RdRp  
131 activity of Middle East respiratory syndrome coronavirus (MERS-CoV) (Min et al., 2020).  
132 Targeting viral protease might be another scenario for the inhibition; a very recent virtual

133 screening study predicted that dasabuvir has a potential to inhibit 3-chymotrypsin-like  
134 protease (3CL<sup>PRO</sup>) of SARS-CoV-2 (Jade et al., 2021).

135 With a HCV subgenomic replicon system, DSB inhibits HCV of genotype 1 with  
136 EC<sub>50</sub> values of < 10 nM (Kati et al., 2015). In contrast, DSB inhibits HuNoV infection with  
137 EC<sub>50</sub>s ranging between 7.55 and 12.41 μM (**Fig. 2**), which is comparable to its  
138 effectiveness to inhibit RdRp activity of MERS-CoV-2 (Min et al., 2020) or infection of  
139 vector-borne flaviviruses (Stefanik et al., 2020). This implies that higher concentration is  
140 required to exert an antiviral effect on non-HCV viruses, possibly due to lower binding  
141 efficiency of DSB to non-HCV RdRp(s) or unknown mechanism of inhibitory action.

142 In summary, through the screening of an antiviral compound library, we  
143 identified DSB as a novel HuNoV inhibitor that warrants further clinical investigation. To  
144 our knowledge, this was a first time to identify '*bona fide*' anti-HuNoV agents using the  
145 HIE culture system. Our study also shed light on the usefulness of the HIE platform for  
146 investigating of anti-HuNoV agents and/or host factors regulating HuNoV infection, which  
147 will contribute to better understanding of HuNoV lifecycle and development of vaccine  
148 and antiviral regimens.

149

## 150 **Acknowledgements**

151 This study was supported by grants from by the Japan Society for the Promotion of  
152 Science KAKENHI Grant JP20K07520 (to T.H.); the Japan Agency for Medical Research  
153 and Development (AMED) Grants JP21fk0108149 (to K.M. and T.H.), JP21fk0108102  
154 (to M.M. and K.M.), JP21fk0108121 (to K.M.), JP21wm0225009 (to M.M.),  
155 JP21fk0108121 (to Y.F.), and NIH Grant PO1 AI057788 (to M.K.E.). We thank Drs.

156 Hiroyuki Shimizu, Shutoku Matsuyama and Noriyo Nagata (National Institute of  
157 Infectious Diseases) for technical assistance.

158

159 **Figure legends:**

160 **Figure 1. Screening for antiviral compounds that inhibit human norovirus infection**

161 **in human intestinal enteroids.** (A-B) Schematic illustrations of compound screening.

162 Three dimensional HIEs (J2) were trypsinized to single cells, and plated in 96-well plate

163 to culture them as 2D monolayers. Differentiated HIE monolayers were then inoculated

164 with GII.4 HuNoV-containing stool filtrates in the presence of the compounds (10  $\mu$ M,

165  $n=1$ ). After 1 hr incubation at 37°C, the cells were washed, and cultured in differentiation

166 medium containing the compounds (10  $\mu$ M) in 100  $\mu$ L volume until 24 hrs post infection

167 (hpi). Viral RNA extracted from the cells and 75  $\mu$ L of supernatant at 1 or 24 hpi was

168 subjected to RT-qPCR to measure viral genome equivalents (GEs). The rest of the

169 supernatant was subjected to LDH assay to measure cytotoxicity. (C) HuNoV replication

170 in J2 monolayers throughout the screening. We performed 7 experiments to screen all

171 326 compounds. DMSO and 2'-C-Methylcytidine (2-CMC, 389  $\mu$ M) were used as controls

172 in every test. Viral GEs in DMSO and 2-CMC treated samples at 24 hpi were normalized

173 to DMSO control at 1 hpi. \*\*  $p < 0.01$  versus DMSO control at 24 hpi, one-way ANOVA

174 followed by Dunnett's multiple-comparison test. (D) Cytotoxicity of 2-CMC in J2

175 monolayers at 24 hpi. Results were normalized to DMSO control. (E) Scatter plot of the %

176 HuNoV GEs vs % cytotoxicity for all tested compounds. Results were normalized to

177 DMSO control. Dasabuvir (DSB), red; G243-1637, blue; 3370-3410, green spots.

178



179 **Figure 2. Effect of dasabuvir on HuNoV infection in HIE monolayers.** J2 (A-B) or J3  
180 (C-D) HIE monolayers were inoculated with GII.4 (A and C) or GII.3 (B and D) HuNoV-  
181 containing stool filtrate in the presence of DSB at the indicated concentrations, and were  
182 cultured until 20 hpi. The percentages of HuNoV GEs (red lines) and cytotoxicity (blue  
183 lines) were determined as in Fig. 1, and were normalized to the DMSO control. Values  
184 represent the mean  $\pm$  s.d. ( $n \geq 6$ ).  $EC_{50}$ ; 50% effective concentration,  $CC_{50}$ ; 50% cytotoxic  
185 concentration.

186

187 **Figure 3. Dasabuvir inhibits SARS-CoV-2 infection in J2 HIE monolayers and**  
188 **VeroE6/TMPRSS2 cells.** (A-B) J2 HIE monolayers were inoculated with RVA (A) and  
189 SARS-CoV-2 (B) in the presence of the indicated compounds, and were cultured until 20  
190 hpi. 2-CMC (389  $\mu$ M) or remdesivir (RDV, 10  $\mu$ M) were used as positive controls. The  
191 percentage of viral GEs were determined by RT-qPCR, and were normalized to the  
192 DMSO control at 20 hpi. Values represent the mean  $\pm$  s.d. ( $n \geq 5$ ). (C-D)  
193 VeroE6/TMPRSS2 cells were left-uninfected or infected with SARS-CoV-2 for 20 hrs in  
194 the presence of the indicated compounds. The cells were then stained with anti-SARS-  
195 CoV-2 Spike RBD monoclonal antibody and DAPI followed by imaging analysis. (C)  
196 Representative fluorescence images showing SARS-CoV-2 S protein (green) and cell  
197 nucleus (blue). Scale bar, 200  $\mu$ m. (D) The percentages of infected cells were normalized  
198 to those of DMSO-treated cells infected with SARS-CoV-2 at 20 hpi. Values represent  
199 the mean  $\pm$  s.d. ( $n \geq 8$ ). \*\*  $p < 0.01$  versus DMSO control at 20 hpi, one-way ANOVA  
200 followed by Dunnett's multiple-comparison test. n.s., not significant ( $p > 0.05$ ).

201

202 **Figure S1. Validation of the selected 3 compounds in J2 HIE monolayers.** J2 HIE  
203 monolayers were inoculated with GII.4 HuNoV-containing stool filtrate in the presence of  
204 the indicated compounds (10  $\mu$ M), and were cultured until 24 hpi. The percentages of  
205 HuNoV GEs (A) and cytotoxicity (B) for each compound were determined, as in Fig. 1.  
206 Values represent the mean  $\pm$  s.d. ( $n \geq 3$ ). \*\*  $p < 0.01$ , \*  $p < 0.05$  versus DMSO control at  
207 24 hpi, two-tailed Student  $t$  test. n.s., not significant ( $p > 0.05$ ). (C) Chemical structure of  
208 Dasabuvir.

209

210 **Figure S2. Cell viability and cytotoxicity of dasabuvir in J2 HIE monolayers.** J2 HIE  
211 monolayers were treated with DSB at the indicated concentrations for 20 hr. Cell viability  
212 or cytotoxicity was measured using CellTiter-Glo® Luminescent Cell Viability Assay or  
213 Cytotoxicity LDH Assay Kit-WST, respectively. Results were normalized to DMSO  
214 control. Values represent the mean  $\pm$  s.d. ( $n = 7$ ).

215

216 **Figure S3. Inhibitory effect of dasabuvir purchased from different resources on**  
217 **HuNoV infection in J2 HIE monolayers.** J2 HIE monolayers were inoculated with GII.4  
218 HuNoV-containing stool filtrate in the presence of dasabuvir (DSB) purchased from  
219 different resources at the indicated concentrations, and cultured until 20 hpi. The  
220 percentages of HuNoV GEs and cytotoxicity were determined and were normalized to  
221 the DMSO control. Values represent the mean  $\pm$  s.d. ( $n = 4$ ).

222

223 **Figure S4. Cell viability of dasabuvir in VeroE6/TMPRSS2 cells.** VeroE6/TMPRSS2  
224 cells were left-uninfected or infected with SARS-CoV-2 for 20 hrs followed by  
225 immunofluorescence analysis, as described in Material and Methods. The cell numbers

226 were determined by counting cell nucleus. Results were normalized to DMSO-treated  
227 cells infected with SARS-CoV-2. Values represent the mean  $\pm$  s.d. (n = 8).

228

229 **Table S1. Compound screening results.** The percentages of HuNoV GEs and  
230 cytotoxicity in the presence of the indicated compound (10  $\mu$ M, n=1) were determined  
231 and normalized to those of DMSO control.

232

233

## 234 **References**

235

- 236 Alvarado, G., Ettayebi, K., Atmar, R.L., Bombardi, R.G., Kose, N., Estes, M.K., Crowe,  
237 J.E., Jr., 2018. Human Monoclonal Antibodies That Neutralize Pandemic  
238 GII.4 Noroviruses. *Gastroenterology* 155, 1898-1907.
- 239 Cannon, J.L., Bonifacio, J., Bucardo, F., Buesa, J., Bruggink, L., Chan, M.C., Fumian,  
240 T.M., Giri, S., Gonzalez, M.D., Hewitt, J., Lin, J.H., Mans, J., Muñoz, C., Pan, C.Y.,  
241 Pang, X.L., Pietsch, C., Rahman, M., Sakon, N., Selvarangan, R., Browne, H., Barclay,  
242 L., Vinjé, J., 2021. Global Trends in Norovirus Genotype Distribution among Children  
243 with Acute Gastroenteritis. *Emerg Infect Dis* 27, 1438-1445.
- 244 Chan, J.C.M., Mohammad, K.N., Zhang, L.-Y., Wong, S.H., Chan, M.C.-W., 2021.  
245 Targeted Profiling of Immunological Genes during Norovirus Replication in Human  
246 Intestinal Enteroids. *Viruses* 13, 155.
- 247 Chhabra, P., de Graaf, M., Parra, G.I., Chan, M.C., Green, K., Martella, V., Wang, Q.,  
248 White, P.A., Katayama, K., Vennema, H., Koopmans, M.P.G., Vinjé, J., 2019. Updated  
249 classification of norovirus genogroups and genotypes. *J Gen Virol* 100, 1393-1406.
- 250 Costantini, V., Morantz, E.K., Browne, H., Ettayebi, K., Zeng, X.L., Atmar, R.L., Estes,  
251 M.K., Vinjé, J., 2018. Human Norovirus Replication in Human Intestinal Enteroids as  
252 Model to Evaluate Virus Inactivation. *Emerg Infect Dis* 24, 1453-1464.
- 253 Ettayebi, K., Crawford, S.E., Murakami, K., Broughman, J.R., Karandikar, U., Tenge,  
254 V.R., Neill, F.H., Blutt, S.E., Zeng, X.L., Qu, L., Kou, B., Opekun, A.R., Burrin, D.,

255 Graham, D.Y., Ramani, S., Atmar, R.L., Estes, M.K., 2016. Replication of human  
256 noroviruses in stem cell-derived human enteroids. *Science* 353, 1387-1393.

257 Ettayebi, K., Tenge, V.R., Cortes-Penfield, N.W., Crawford, S.E., Neill, F.H., Zeng,  
258 X.L., Yu, X., Ayyar, B.V., Burrin, D., Ramani, S., Atmar, R.L., Estes, M.K., 2021. New  
259 Insights and Enhanced Human Norovirus Cultivation in Human Intestinal Enteroids.  
260 *mSphere* 6.

261 Hosmillo, M., Chaudhry, Y., Nayak, K., Sorgeloos, F., Koo, B.K., Merenda, A., Lillestol,  
262 R., Drumright, L., Zilbauer, M., Goodfellow, I., 2020. Norovirus Replication in Human  
263 Intestinal Epithelial Cells Is Restricted by the Interferon-Induced JAK/STAT Signaling  
264 Pathway and RNA Polymerase II-Mediated Transcriptional Responses. *mBio* 11.

265 Jade, D., Ayyamperumal, S., Tallapaneni, V., Joghee Nanjan, C.M., Barge, S., Mohan,  
266 S., Nanjan, M.J., 2021. Virtual high throughput screening: Potential inhibitors for SARS-  
267 CoV-2 PL(PRO) and 3CL(PRO) proteases. *Eur J Pharmacol* 901, 174082.

268 Jones, M.K., Watanabe, M., Zhu, S., Graves, C.L., Keyes, L.R., Grau, K.R., Gonzalez-  
269 Hernandez, M.B., Iovine, N.M., Wobus, C.E., Vinjé, J., Tibbetts, S.A., Wallet, S.M.,  
270 Karst, S.M., 2014. Enteric bacteria promote human and mouse norovirus infection of B  
271 cells. *Science* 346, 755-759.

272 Kati, W., Koev, G., Irvin, M., Beyer, J., Liu, Y., Krishnan, P., Reisch, T., Mondal, R.,  
273 Wagner, R., Molla, A., Maring, C., Collins, C., 2015. In vitro activity and resistance  
274 profile of dasabuvir, a nonnucleoside hepatitis C virus polymerase inhibitor. *Antimicrob*  
275 *Agents Chemother* 59, 1505-1511.

276 Lamers, M.M., Beumer, J., van der Vaart, J., Knoops, K., Puschhof, J., Breugem, T.I.,  
277 Ravelli, R.B.G., Paul van Schayck, J., Mykytyn, A.Z., Duimel, H.Q., van Donselaar, E.,  
278 Riesebosch, S., Kuijpers, H.J.H., Schipper, D., van de Wetering, W.J., de Graaf, M.,  
279 Koopmans, M., Cuppen, E., Peters, P.J., Haagmans, B.L., Clevers, H., 2020. SARS-  
280 CoV-2 productively infects human gut enterocytes. *Science* 369, 50-54.

281 Lin, S.C., Qu, L., Ettayebi, K., Crawford, S.E., Blutt, S.E., Robertson, M.J., Zeng, X.L.,  
282 Tenge, V.R., Ayyar, B.V., Karandikar, U.C., Yu, X., Coarfa, C., Atmar, R.L., Ramani, S.,  
283 Estes, M.K., 2020. Human norovirus exhibits strain-specific sensitivity to host interferon  
284 pathways in human intestinal enteroids. *Proc Natl Acad Sci U S A* 117, 23782-23793.

285 Low, Z.Y., Farouk, I.A., Lal, S.K., 2020. Drug Repositioning: New Approaches and  
286 Future Prospects for Life-Debilitating Diseases and the COVID-19 Pandemic Outbreak.  
287 *Viruses* 12.

288 Mallory, M.L., Lindesmith, L.C., Graham, R.L., Baric, R.S., 2019. GII.4 Human  
289 Norovirus: Surveying the Antigenic Landscape. *Viruses* 11.

290 Matsuyama, S., Nao, N., Shirato, K., Kawase, M., Saito, S., Takayama, I., Nagata, N.,  
291 Sekizuka, T., Katoh, H., Kato, F., Sakata, M., Tahara, M., Kutsuna, S., Ohmagari, N.,  
292 Kuroda, M., Suzuki, T., Kageyama, T., Takeda, M., 2020. Enhanced isolation of SARS-  
293 CoV-2 by TMPRSS2-expressing cells. *Proc Natl Acad Sci U S A* 117, 7001-7003.  
294 Min, J.S., Kim, G.W., Kwon, S., Jin, Y.H., 2020. A Cell-Based Reporter Assay for  
295 Screening Inhibitors of MERS Coronavirus RNA-Dependent RNA Polymerase Activity.  
296 *J Clin Med* 9.  
297 Murakami, K., Tenge, V.R., Karandikar, U.C., Lin, S.C., Ramani, S., Ettayebi, K.,  
298 Crawford, S.E., Zeng, X.L., Neill, F.H., Ayyar, B.V., Katayama, K., Graham, D.Y.,  
299 Bieberich, E., Atmar, R.L., Estes, M.K., 2020. Bile acids and ceramide overcome the  
300 entry restriction for GII.3 human norovirus replication in human intestinal enteroids.  
301 *Proc Natl Acad Sci U S A* 117, 1700-1710.  
302 Sato, S., Hisaie, K., Kurokawa, S., Suzuki, A., Sakon, N., Uchida, Y., Yuki, Y., Kiyono,  
303 H., 2019. Human Norovirus Propagation in Human Induced Pluripotent Stem Cell-  
304 Derived Intestinal Epithelial Cells. *Cell Mol Gastroenterol Hepatol* 7, 686-688.e685.  
305 Saxena, K., Blutt, S.E., Ettayebi, K., Zeng, X.L., Broughman, J.R., Crawford, S.E.,  
306 Karandikar, U.C., Sastri, N.P., Conner, M.E., Opekun, A.R., Graham, D.Y., Qureshi,  
307 W., Sherman, V., Foulke-Abel, J., In, J., Kovbasnjuk, O., Zachos, N.C., Donowitz, M.,  
308 Estes, M.K., 2016. Human Intestinal Enteroids: a New Model To Study Human  
309 Rotavirus Infection, Host Restriction, and Pathophysiology. *J Virol* 90, 43-56.  
310 Stefanik, M., Valdes, J.J., Ezebuo, F.C., Haviernik, J., Uzochukwu, I.C., Fojtikova, M.,  
311 Salat, J., Eyer, L., Ruzek, D., 2020. FDA-Approved Drugs Efavirenz, Tipranavir, and  
312 Dasabuvir Inhibit Replication of Multiple Flaviviruses in Vero Cells. *Microorganisms* 8.  
313 Trivella, J.P., Gutierrez, J., Martin, P., 2015. Dasabuvir: a new direct antiviral agent for  
314 the treatment of hepatitis C. *Expert Opinion on Pharmacotherapy* 16, 617-624.  
315 Van Dycke, J., Ny, A., Conceição-Neto, N., Maes, J., Hosmillo, M., Cuvry, A.,  
316 Goodfellow, I., Nogueira, T.C., Verbeken, E., Matthijnssens, J., de Witte, P., Neyts, J.,  
317 Rocha-Pereira, J., 2019. A robust human norovirus replication model in zebrafish  
318 larvae. *PLoS Pathog* 15, e1008009.  
319 Watashi, K., 2021. Identifying and repurposing antiviral drugs against severe acute  
320 respiratory syndrome coronavirus 2 with in silico and in vitro approaches. *Biochem*  
321 *Biophys Res Commun* 538, 137-144.  
322 Zou, W.Y., Blutt, S.E., Crawford, S.E., Ettayebi, K., Zeng, X.L., Saxena, K., Ramani, S.,  
323 Karandikar, U.C., Zachos, N.C., Estes, M.K., 2019. Human Intestinal Enteroids: New  
324 Models to Study Gastrointestinal Virus Infections. *Methods Mol Biol* 1576, 229-247.  
325

**Figure 1**

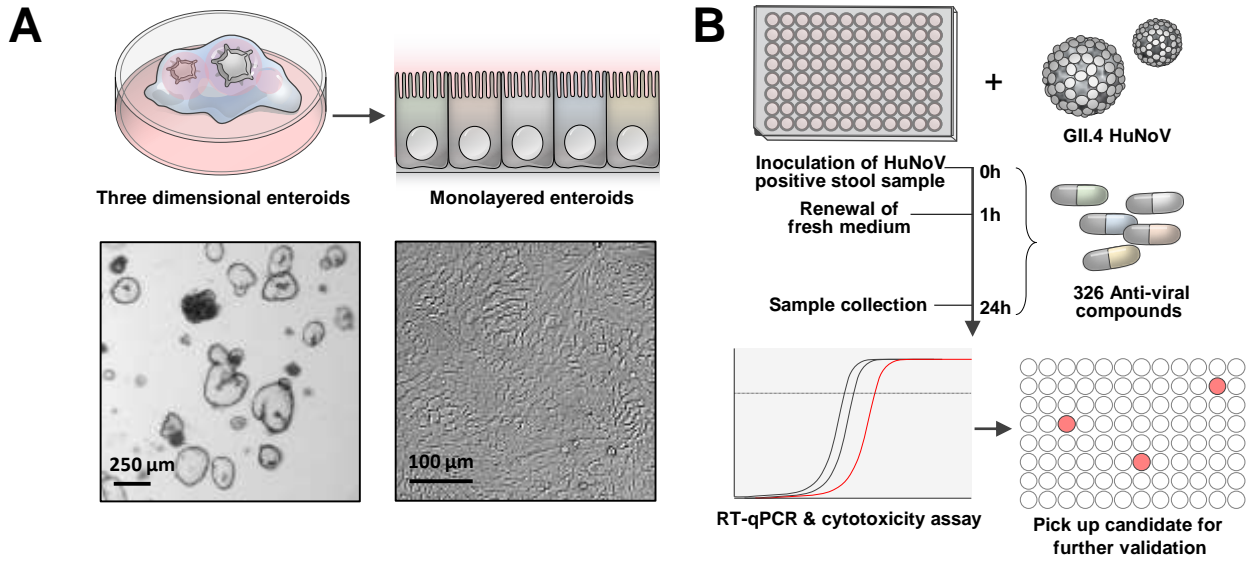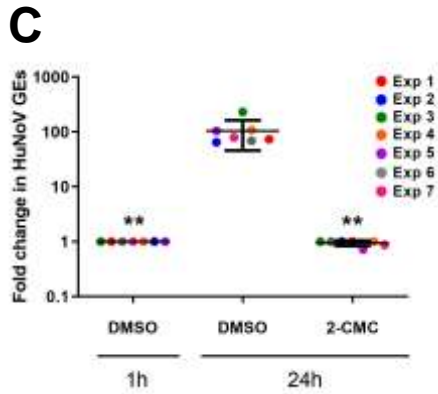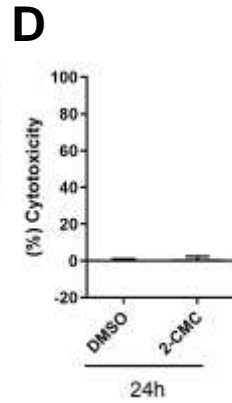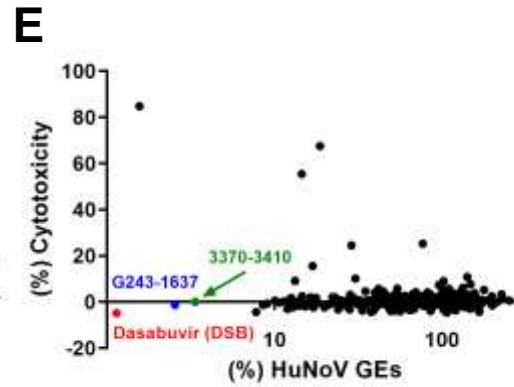

**Figure 2**

**A J2 + GII.4**

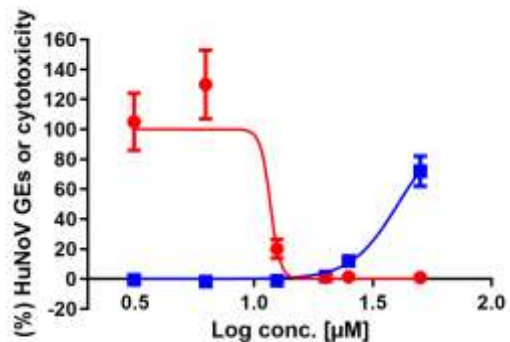

● (% HuNoV GEs (EC<sub>50</sub> = 11.71 µM))  
■ (% Cytotoxicity (CC<sub>50</sub> = 40.32 µM))

**B J2 + GII.3**

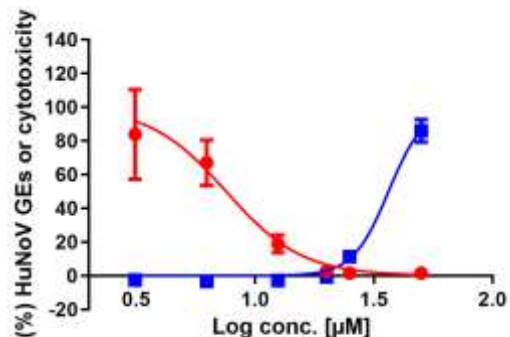

● (% HuNoV GEs (EC<sub>50</sub> = 7.55 µM))  
■ (% Cytotoxicity (CC<sub>50</sub> = 36.45 µM))

**C J3 + GII.4**

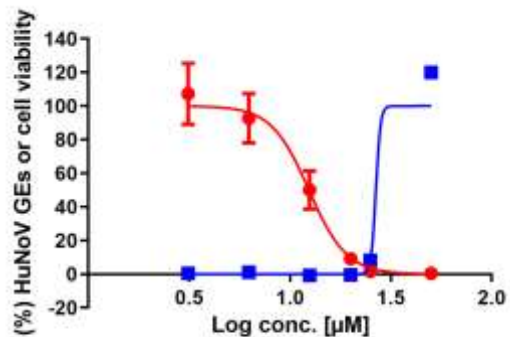

● (% HuNoV GEs (EC<sub>50</sub> = 12.41 µM))  
■ (% Cytotoxicity (CC<sub>50</sub> = 26.64 µM))

**D J3 + GII.3**

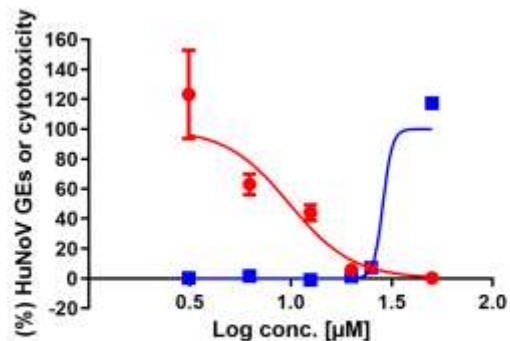

● (% HuNoV GEs (EC<sub>50</sub> = 9.85 µM))  
■ (% Cytotoxicity (CC<sub>50</sub> = 28.63 µM))

Figure 3

**A J2 + RVA**

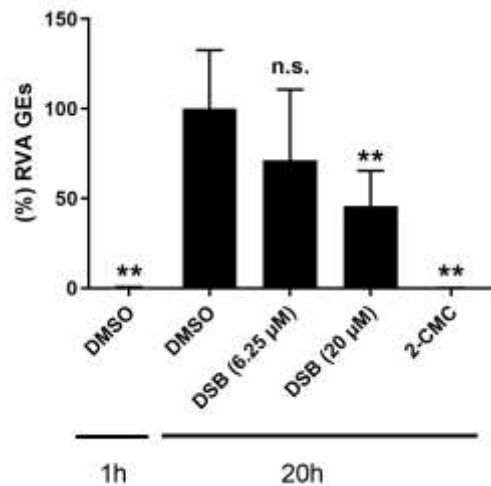

**B J2 + SARS-CoV-2**

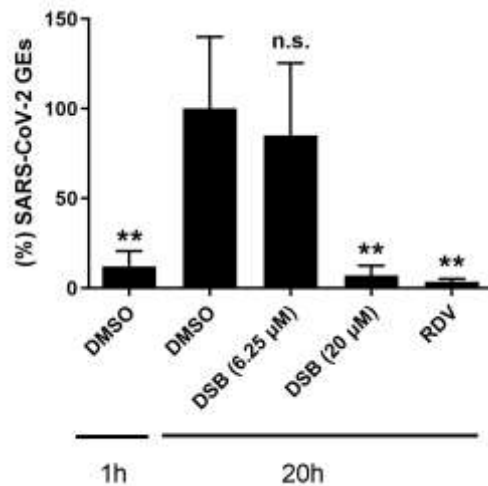

**C**

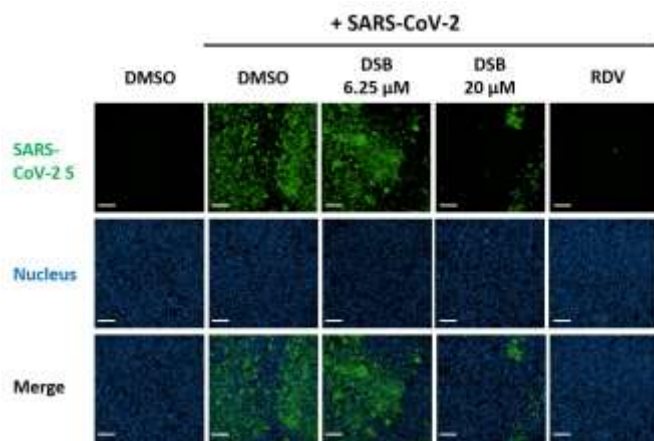

**D**

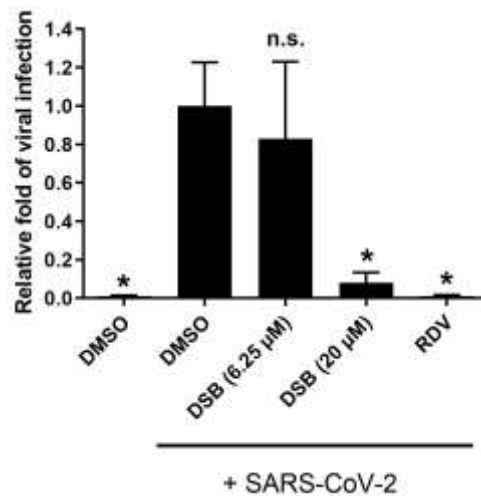



Figure S1

A

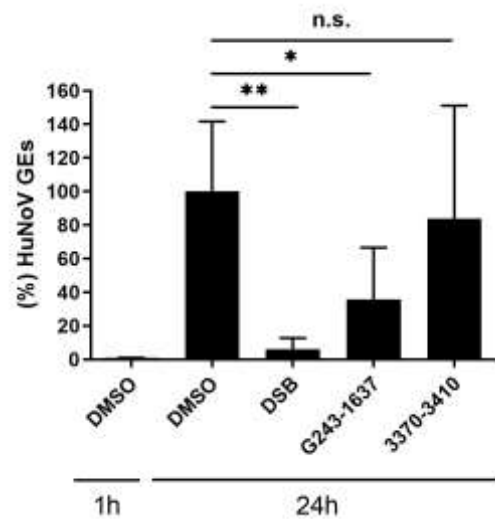

B

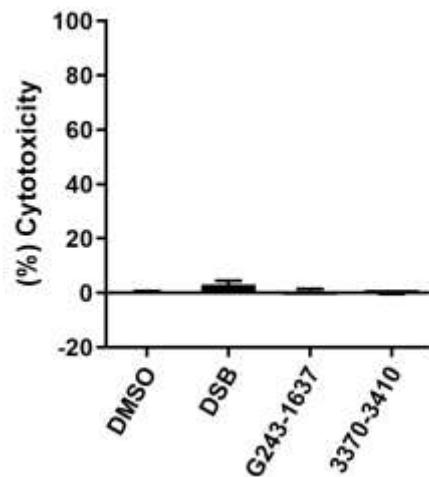

C

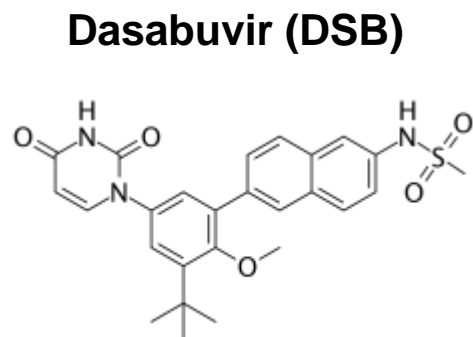

Figure S2

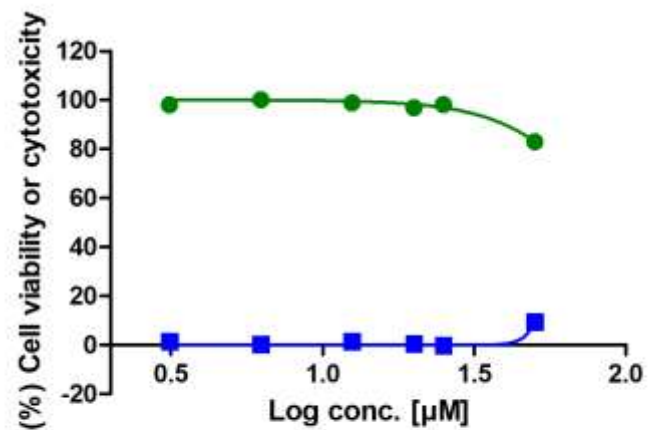

- Cell viability ( $CC_{50} > 50 \mu\text{M}$ )
- Cytotoxicity ( $CC_{50} > 50 \mu\text{M}$ )

Figure S3

**A** DSB (Selleck, S5402)

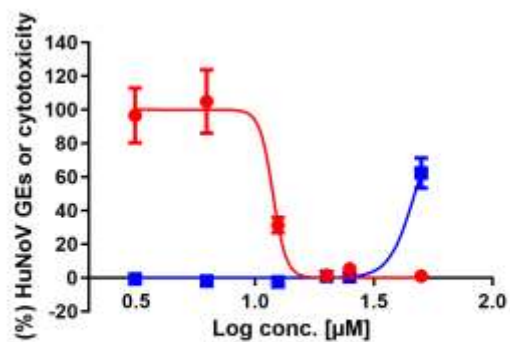

● (% HuNoV GEs ( $EC_{50} = 11.89 \mu\text{M}$ ))  
■ (% Cytotoxicity ( $CC_{50} = 46.98 \mu\text{M}$ ))

**B** DSB (Cayman Chemical, 18482)

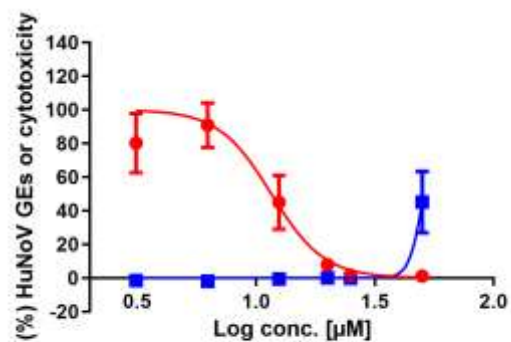

● (% HuNoV GEs ( $EC_{50} = 11.59 \mu\text{M}$ ))  
■ (% Cytotoxicity ( $CC_{50} = 50.67 \mu\text{M}$ ))

Figure S4

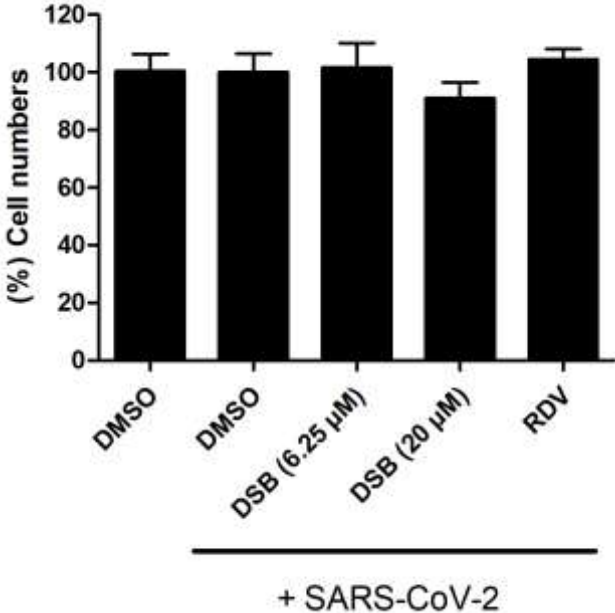

Table S1

| Compound                        | (%) HuNoV GEs | (%) Cytotoxicity |
|---------------------------------|---------------|------------------|
| Dasabuvir                       | 1.14          | -4.83            |
| AG-1478                         | 1.56          | 84.88            |
| G243-1637                       | 2.54          | -1.23            |
| 3370-3410                       | 3.36          | 0.00             |
| Oltipraz                        | 7.76          | -4.37            |
| Dolutegravir                    | 8.52          | -1.39            |
| D128-0609                       | 9.02          | -0.67            |
| Cefotaxime sodium               | 10.06         | 0.51             |
| Y070-3535                       | 10.72         | -0.22            |
| K978-0113                       | 11.46         | 0.34             |
| 4778-0092                       | 11.93         | 0.09             |
| Oleanonic Acid                  | 11.94         | -3.05            |
| Enoxacin                        | 12.49         | 0.62             |
| Y030-6944                       | 12.51         | -1.89            |
| Y031-1132                       | 12.56         | 1.79             |
| Floxuridine                     | 12.64         | 0.65             |
| C547-0919                       | 12.83         | -2.30            |
| 8018-5978                       | 12.89         | -0.12            |
| Triciribine                     | 13.24         | 9.12             |
| 6540-0274                       | 13.95         | 0.34             |
| Voriconazole                    | 14.05         | -1.63            |
| Crystal Violet                  | 14.53         | 55.49            |
| E155-0203                       | 14.58         | 2.50             |
| 5436-1131                       | 15.22         | -1.95            |
| Amprenavir                      | 15.87         | -0.21            |
| Betulinic acid                  | 16.39         | 2.09             |
| Arbidol hydrochloride           | 16.88         | 15.58            |
| D389-0267                       | 17.01         | -2.35            |
| Merimepodib                     | 17.03         | 0.74             |
| R092-0019                       | 17.68         | 1.84             |
| E565-0914                       | 18.05         | -0.45            |
| Geldanamycin                    | 18.63         | 67.53            |
| Cobicistat                      | 19.83         | -2.34            |
| Ethidium bromide                | 21.15         | -1.16            |
| Penciclovir                     | 22.14         | 2.02             |
| Valacyclovir hydrochloride      | 22.45         | 0.09             |
| Diammonium Glycyrrhizinate      | 22.61         | 0.23             |
| Sofosbuvir                      | 22.63         | 0.74             |
| Wiskostatin                     | 22.91         | 2.02             |
| Entecavir hydrate               | 23.60         | -1.04            |
| E582-0206                       | 23.81         | 0.09             |
| 1,2,3,4,6-O-Pentagalloylglucose | 23.98         | -3.29            |
| 8020-0349                       | 24.10         | -1.70            |
| Dapivirine                      | 24.80         | 0.74             |
| Y030-9081                       | 25.30         | -0.21            |
| 5829-8232                       | 26.13         | -1.42            |
| Y031-2258                       | 27.09         | 0.90             |
| Famciclovir                     | 27.31         | 0.72             |
| 1630-0616                       | 27.33         | -1.90            |
| Fluorouracil                    | 27.42         | -0.47            |

|                                                 |       |       |
|-------------------------------------------------|-------|-------|
| 2377-0618                                       | 27.91 | -0.77 |
| Azlocillin sodium                               | 28.00 | -1.98 |
| C276-0156                                       | 28.06 | -3.25 |
| Vagistat                                        | 28.28 | 3.16  |
| Etravirine                                      | 28.81 | 24.52 |
| Oxethazaine                                     | 29.35 | 1.91  |
| 0233-0085                                       | 29.46 | 2.03  |
| D090-0045                                       | 30.38 | 10.15 |
| Cytarabine                                      | 31.34 | -0.77 |
| 7567-0240                                       | 31.82 | -1.15 |
| Turofexorate Isopropyl                          | 31.93 | 0.86  |
| Guanosine                                       | 32.26 | 0.15  |
| Doravirine                                      | 32.68 | -1.39 |
| E461-0189                                       | 33.20 | -0.26 |
| 7472-0163                                       | 33.47 | -3.79 |
| Clevudine                                       | 33.75 | -0.09 |
| Adenosine 5'-monophosphate monohydrate          | 34.38 | 0.18  |
| Brivudine                                       | 34.83 | 4.68  |
| 0509-0350                                       | 34.99 | 0.43  |
| C528-0431                                       | 35.15 | -1.34 |
| C260-2491                                       | 35.51 | 0.35  |
| 4456-2665                                       | 35.77 | 0.63  |
| Y030-9422                                       | 36.07 | -0.35 |
| HZ-1157                                         | 36.74 | 0.70  |
| D715-1039                                       | 37.50 | -0.09 |
| 8014-8659                                       | 37.68 | -4.37 |
| Y030-9216                                       | 39.06 | -0.96 |
| Bay 41-4109 racemate                            | 39.26 | -3.52 |
| Ilaprazole sodium                               | 39.34 | 1.57  |
| Nelfinavir Mesylate                             | 39.67 | 4.06  |
| Tizoxanide                                      | 39.97 | 2.28  |
| Dehydroandrographolide Succinate Potassium Salt | 40.48 | -2.10 |
| K786-6982                                       | 40.91 | 0.34  |
| C256-1592                                       | 40.91 | -1.57 |
| Rimantadine hydrochloride                       | 40.94 | 2.41  |
| Tinidazole                                      | 41.02 | -0.09 |
| C517-4132                                       | 41.72 | -0.69 |
| Y031-0424                                       | 41.78 | 5.76  |
| Cefixime                                        | 41.90 | 2.28  |
| D178-0176                                       | 42.09 | 0.56  |
| G243-0866                                       | 42.35 | 0.52  |
| Phthalylsulfathiazole                           | 44.00 | 2.05  |
| Nitazoxanide                                    | 44.54 | 4.63  |
| Inositol                                        | 44.92 | 2.88  |
| Paritaprevir                                    | 44.98 | -0.33 |
| 8010-1605                                       | 45.00 | 0.09  |
| 0611-0108                                       | 45.12 | -0.92 |
| D715-0622                                       | 45.64 | 0.70  |
| D044-0078                                       | 45.84 | 1.04  |
| Oxytetracycline                                 | 46.16 | 3.05  |
| Y031-2476                                       | 46.31 | 1.68  |
| Dermofongin                                     | 46.93 | -0.74 |

|                       |       |       |
|-----------------------|-------|-------|
| 6321-0204             | 48.24 | -0.43 |
| Trovirdine            | 48.30 | -2.69 |
| Selonsertib           | 48.46 | -2.58 |
| 8015-6196             | 49.03 | 0.90  |
| C279-0863             | 49.22 | 0.44  |
| Raltegravir           | 49.31 | 1.45  |
| 8017-8518             | 49.34 | -3.92 |
| E848-0049             | 49.53 | -1.26 |
| Sulfadoxine           | 49.98 | 2.36  |
| C281-0111             | 50.00 | -1.15 |
| Pirodavir             | 50.55 | -3.64 |
| 6872-1469             | 50.87 | 0.43  |
| Vidarabine            | 51.42 | -2.58 |
| Artemisinin           | 51.67 | 1.63  |
| Osalmid               | 52.08 | 3.16  |
| 5941-1200             | 52.40 | -3.79 |
| Forsythin             | 52.42 | 1.24  |
| C527-0619             | 52.56 | -2.35 |
| Orotic acid           | 52.58 | 0.45  |
| Maraviroc             | 52.60 | -1.98 |
| Y031-4822             | 52.62 | 0.56  |
| Y030-3795             | 52.65 | 1.56  |
| Ritonavir             | 52.68 | 1.11  |
| Didanosine            | 52.78 | -0.07 |
| Telaprevir            | 53.18 | 0.86  |
| C677-0056             | 53.38 | 3.79  |
| E565-0873             | 53.67 | 0.09  |
| Cabotegravir          | 54.14 | 5.83  |
| YYA-021               | 54.17 | -1.15 |
| Aciclovir             | 54.44 | 0.59  |
| C241-1871             | 54.62 | -2.41 |
| C848-0358             | 54.70 | 0.52  |
| Tenofovir alafenamide | 55.19 | -0.20 |
| Iohexol               | 55.34 | 1.11  |
| C085-2292             | 55.42 | 1.13  |
| Emtricitabine         | 55.47 | 2.80  |
| C857-1956             | 55.72 | 0.72  |
| Vitamin E Acetate     | 55.75 | 1.21  |
| Oxymatrine            | 56.15 | 2.33  |
| E793-3695             | 56.38 | -4.02 |
| Tenofovir             | 56.45 | 0.98  |
| Nevirapine            | 56.63 | 0.72  |
| C328-0243             | 56.69 | 0.78  |
| Zidovudine            | 57.57 | 0.59  |
| KIN1148               | 58.10 | 0.52  |
| 4223-6713             | 58.85 | 2.22  |
| Nandrolone decanoate  | 58.93 | 0.98  |
| Dichlorisone Acetate  | 59.14 | -1.58 |
| Velpatasvir           | 59.83 | 1.45  |
| Limonin               | 59.90 | 0.73  |
| Y041-2092             | 60.06 | 1.30  |
| Rifampicin            | 60.21 | 2.64  |
| G856-4392             | 60.30 | 1.04  |

|                             |       |       |
|-----------------------------|-------|-------|
| C470-0438                   | 60.97 | 1.13  |
| C547-0142                   | 61.21 | 0.09  |
| Amenamevir                  | 61.67 | 0.09  |
| E243-0077                   | 61.92 | -2.53 |
| Lonafarnib                  | 62.33 | 1.84  |
| K786-5923                   | 62.64 | 1.00  |
| Fluensulfone                | 63.19 | -2.22 |
| 5782-5821                   | 63.42 | 1.56  |
| Dexchlorpheniramine Maleate | 63.62 | -3.40 |
| 5991-0006                   | 64.26 | -1.68 |
| Pritelivir                  | 64.49 | -1.63 |
| Ribavirin                   | 64.55 | -0.09 |
| Abacavir                    | 64.88 | 0.27  |
| 6321-0334                   | 65.13 | -3.45 |
| 2512-0260                   | 65.73 | 0.70  |
| Chloroxylenol               | 65.87 | 1.68  |
| Atazanavir                  | 66.38 | 0.72  |
| C700-1353                   | 66.68 | -2.24 |
| Adefovir dipivoxil          | 67.07 | 3.59  |
| Dendrid                     | 67.26 | -0.36 |
| Xanthohumol                 | 67.33 | 2.40  |
| G243-1720                   | 68.21 | -3.02 |
| 8004-9093                   | 68.82 | -1.39 |
| C270-0058                   | 69.28 | -1.15 |
| Betulin                     | 69.81 | 4.24  |
| Y041-2077                   | 70.07 | 2.78  |
| Telbivudine                 | 70.21 | -0.33 |
| C677-0152                   | 70.48 | -0.69 |
| Beta-Cyclodextrin           | 70.60 | -0.91 |
| MGL3196                     | 70.80 | -0.56 |
| K780-0942                   | 70.93 | 0.78  |
| Andrographolide             | 70.94 | -1.18 |
| 5991-0071                   | 71.37 | 0.45  |
| Zalcitabine                 | 71.45 | 2.88  |
| 4072-2560                   | 72.37 | -0.52 |
| G847-0104                   | 72.73 | -0.45 |
| D051-0007                   | 75.02 | 0.46  |
| Y031-0201                   | 75.43 | -0.26 |
| 4270-0405                   | 75.84 | -1.22 |
| 8010-6143                   | 75.89 | -0.17 |
| Resiquimod                  | 76.69 | 2.61  |
| Miconazole                  | 76.75 | 25.21 |
| Trifluridine                | 77.12 | 0.46  |
| Y030-4666                   | 77.23 | 1.13  |
| 8015-2049                   | 78.12 | -1.72 |
| Rolipram                    | 78.65 | -0.46 |
| K286-0899                   | 78.94 | 2.12  |
| Favipiravir                 | 80.97 | -1.51 |
| E521-1399                   | 81.36 | -0.34 |
| Oleanolic Acid              | 82.04 | 4.14  |
| C700-1366                   | 83.21 | 2.09  |
| Patchouli alcohol           | 83.87 | 1.24  |
| C466-0437                   | 84.93 | 2.53  |



|                                      |        |       |
|--------------------------------------|--------|-------|
| 4896-3719                            | 85.51  | -3.91 |
| Salicylanilide                       | 85.53  | 1.82  |
| Clemizole                            | 85.68  | 3.11  |
| Y041-1917                            | 85.81  | -1.61 |
| Fostemsavir                          | 87.35  | -2.34 |
| Lomibuvir                            | 87.62  | -1.75 |
| Foscarnet sodium                     | 88.54  | 1.07  |
| 1349-0002                            | 90.28  | 0.96  |
| Dicurone                             | 90.75  | 1.49  |
| C519-2093                            | 90.86  | 0.26  |
| Darunavir                            | 91.79  | 0.74  |
| K786-8151                            | 93.07  | -1.12 |
| Y030-6369                            | 95.25  | 1.82  |
| Econazole                            | 95.76  | 7.35  |
| C528-0945                            | 96.16  | -0.90 |
| Ebselen                              | 96.70  | 2.77  |
| Baicalin                             | 97.70  | 1.68  |
| 7752-0085                            | 98.30  | 0.78  |
| 1630-1692                            | 99.02  | -0.35 |
| E535-6327                            | 99.93  | 1.01  |
| Ampicillin Trihydrate                | 99.95  | 1.14  |
| Ethambutol dihydrochloride           | 100.33 | 0.23  |
| C795-0720                            | 100.75 | 0.72  |
| Naringin                             | 100.79 | 5.67  |
| Des(benzylpyridyl) Atazanavi         | 101.09 | 2.40  |
| Lopinavir                            | 101.84 | 9.07  |
| 8015-2125                            | 102.00 | 3.68  |
| 8014-9100                            | 102.04 | -3.33 |
| Mecarbinat                           | 102.13 | 0.93  |
| Glycyrrhizin                         | 102.52 | 4.28  |
| C466-0389                            | 102.90 | 0.57  |
| D043-0313                            | 103.02 | 1.26  |
| C226-3999                            | 103.27 | -0.46 |
| Catalpol                             | 104.47 | 3.07  |
| G008-1418                            | 104.79 | 0.70  |
| R052-0761                            | 104.95 | 1.95  |
| 8017-8512                            | 106.48 | -4.70 |
| Erythromycin ethylsuccinate          | 106.62 | 0.23  |
| 6321-0504                            | 107.80 | -2.76 |
| Tetracycline                         | 108.05 | 0.09  |
| Spectinomycin dihydrochloride        | 109.17 | -1.44 |
| Y020-7585                            | 109.80 | 1.00  |
| K832-4216                            | 109.98 | 5.71  |
| 6872-1644                            | 111.18 | -3.33 |
| D715-0631                            | 111.30 | -1.49 |
| K783-0395                            | 112.04 | -0.92 |
| 6641-0204                            | 112.44 | -2.91 |
| 8011-7669                            | 112.53 | -0.12 |
| Spermine                             | 115.70 | 2.77  |
| Cefepime Dihydrochloride Monohydrate | 116.48 | 3.73  |
| Ganciclovir                          | 117.43 | 3.59  |
| Rilpivirine                          | 117.49 | 0.20  |
| Lamivudine                           | 118.04 | 0.86  |

|                          |        |       |
|--------------------------|--------|-------|
| Cefdinir                 | 118.35 | 2.33  |
| K788-8290                | 118.67 | 1.22  |
| Moroxydine hydrochloride | 119.22 | -1.11 |
| E570-0242                | 119.50 | 0.87  |
| E207-1342                | 120.58 | -3.68 |
| Y041-3934                | 120.81 | 1.49  |
| 8011-6210                | 121.01 | 0.56  |
| 6064-0094                | 121.40 | -2.02 |
| Stavudine                | 123.60 | 2.15  |
| C226-3957                | 123.88 | -0.34 |
| Vitamin E                | 125.47 | -0.33 |
| 7706-1060                | 125.74 | -1.05 |
| Y070-3375                | 126.02 | 1.00  |
| C527-0550                | 130.07 | 4.71  |
| C328-0429                | 130.84 | 2.26  |
| E734-2662                | 131.61 | 0.80  |
| 6526-0824                | 131.97 | 2.41  |
| Ledipasvir acetone       | 133.29 | 6.17  |
| G855-2047                | 133.69 | -2.02 |
| Efavirenz                | 134.78 | 1.69  |
| C301-6874                | 139.45 | 1.56  |
| 8013-2327                | 139.52 | -2.35 |
| 8015-3915                | 140.84 | 0.26  |
| Verdinexor               | 141.53 | 10.81 |
| C618-0871                | 142.69 | -1.49 |
| PSI6206                  | 143.70 | 3.20  |
| 6214-0789                | 143.78 | -0.22 |
| C697-0280                | 144.66 | -2.24 |
| G402-0939                | 147.17 | 1.01  |
| C328-0222                | 147.26 | 1.90  |
| 5282-1184                | 147.35 | -2.91 |
| Y031-2490                | 147.45 | 1.56  |
| 8011-7237                | 147.64 | 7.61  |
| Darunavir Ethanolate     | 147.86 | -0.07 |
| 6228-0891                | 147.93 | -0.87 |
| E717-0652                | 148.85 | 0.96  |
| C677-0057                | 155.51 | -0.35 |
| 6466-0862                | 155.85 | -0.22 |
| C719-0236                | 156.11 | -2.18 |
| 8009-6815                | 156.54 | 3.81  |
| C075-0149                | 157.54 | 0.45  |
| G402-0849                | 158.24 | 1.12  |
| Clotrimazole             | 158.66 | 0.51  |
| K940-1348                | 160.80 | -0.11 |
| Bicyclol                 | 161.99 | 0.26  |
| K286-3667                | 162.45 | 0.07  |
| Elvitegravir             | 163.99 | 0.85  |
| Naringenin               | 164.68 | 1.14  |
| C697-0502                | 166.44 | -4.26 |
| 6321-0438                | 166.79 | -3.79 |
| 6872-0590                | 169.40 | -0.34 |
| C430-0518                | 170.30 | -1.01 |
| Isoliquiritigenin        | 172.34 | 0.86  |

|                              |        |       |
|------------------------------|--------|-------|
| Daclatasvir dihydrochloride  | 178.20 | 5.28  |
| 8014-1990                    | 179.78 | 0.61  |
| Valganciclovir hydrochloride | 188.71 | 0.33  |
| E975-1597                    | 190.33 | 0.56  |
| Emricasan                    | 198.22 | 1.13  |
| (-)-Epigallocatechin Gallate | 198.37 | 2.41  |
| C050-0346                    | 198.78 | -1.57 |
| E461-0584                    | 204.16 | -0.90 |
| Revaprazan hydrochloride     | 214.12 | 0.20  |
| G404-0515                    | 226.81 | 3.36  |
| Amantadine hydrochloride     | 231.71 | 1.24  |
| Aloe-emodin                  | 253.04 | 0.59  |
